# Supplementary material for: Prediction of drugs having opposite effects on disease genes in a directed network
Source: Springer Nature journal article supplement (doi:10.1186/s12918-015-0243-2), 2016-01-11

Figure S1 – Flow diagram of PDOD

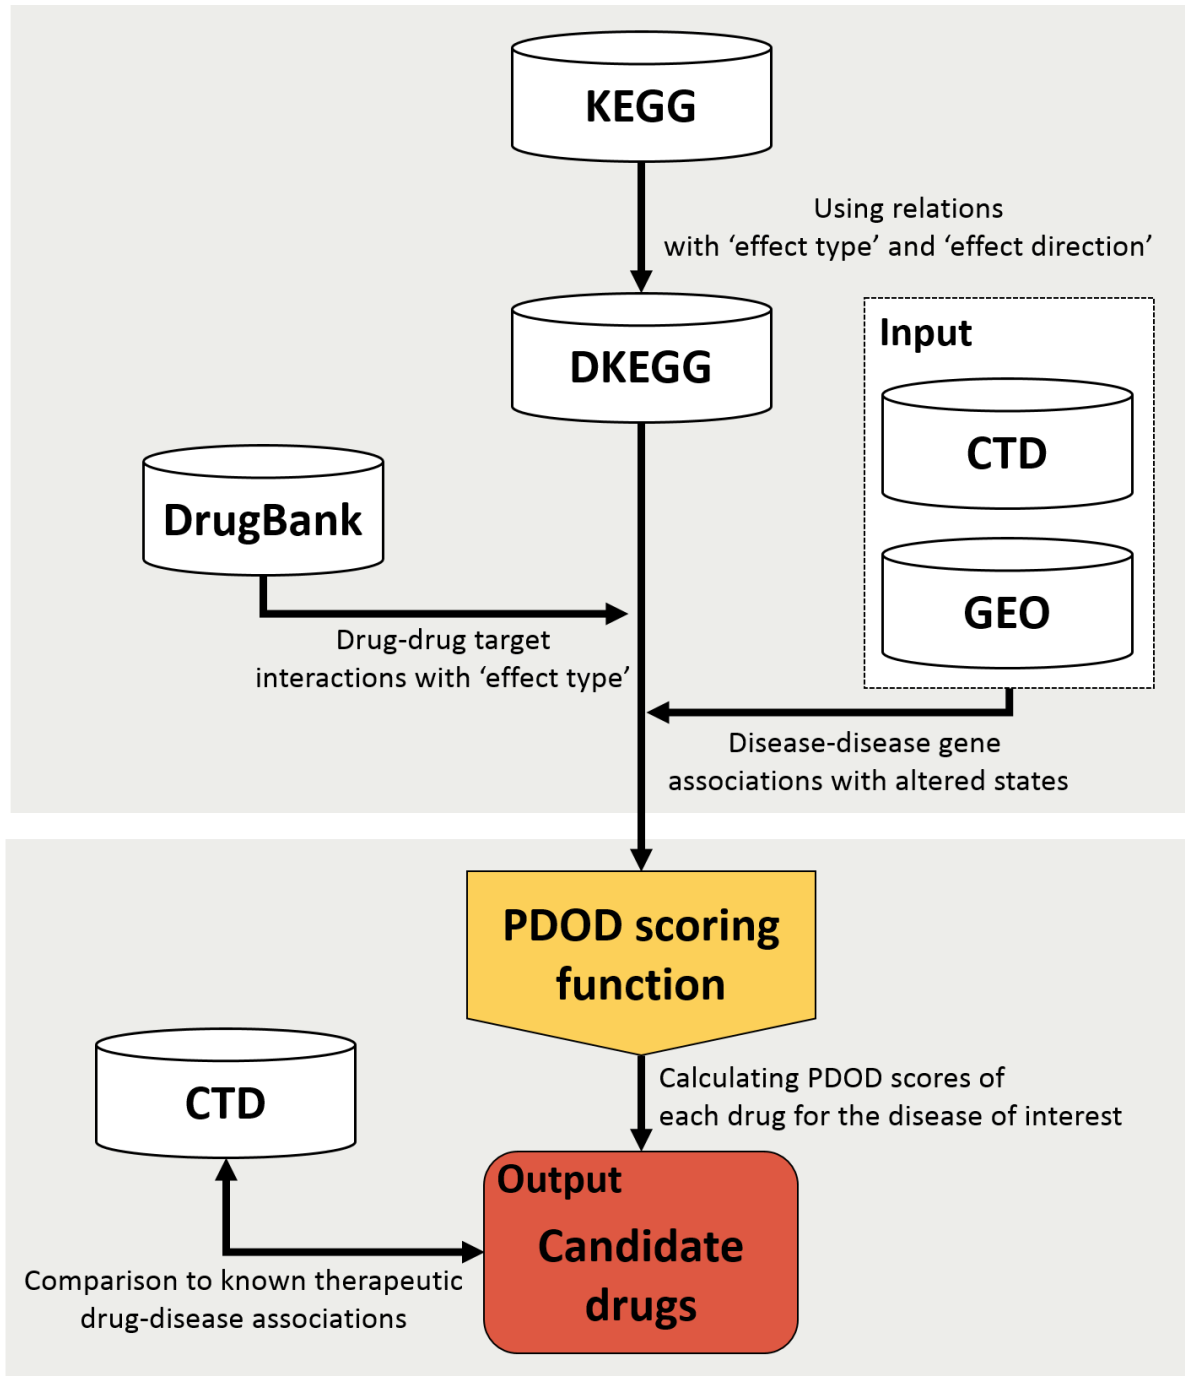

Supplement: 12918_2015_243_MOESM1_ESM.pdf [file 12918_2015_243_MOESM1_ESM.pdf]
