# Supplementary material for: Prediction of drugs having opposite effects on disease genes in a directed network
Source: Springer Nature journal article supplement (doi:10.1186/s12918-015-0243-2), 2016-01-11

Figure S4 – Adenocarcinoma of lung

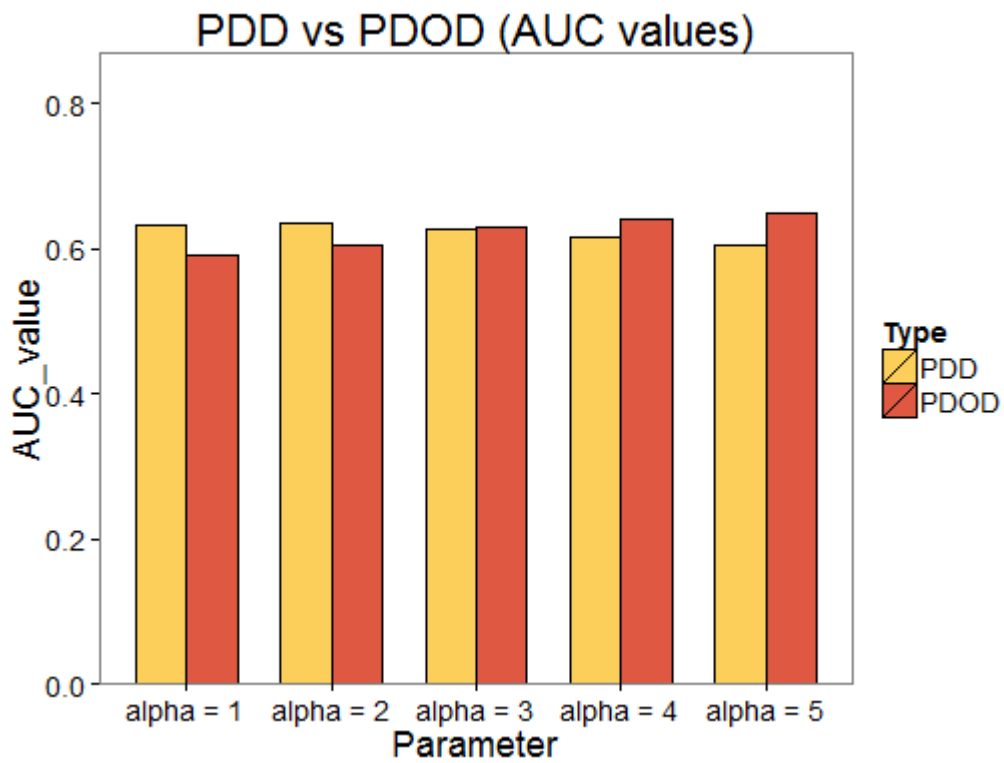

Figure S5 – Acute myelocytic leukemia

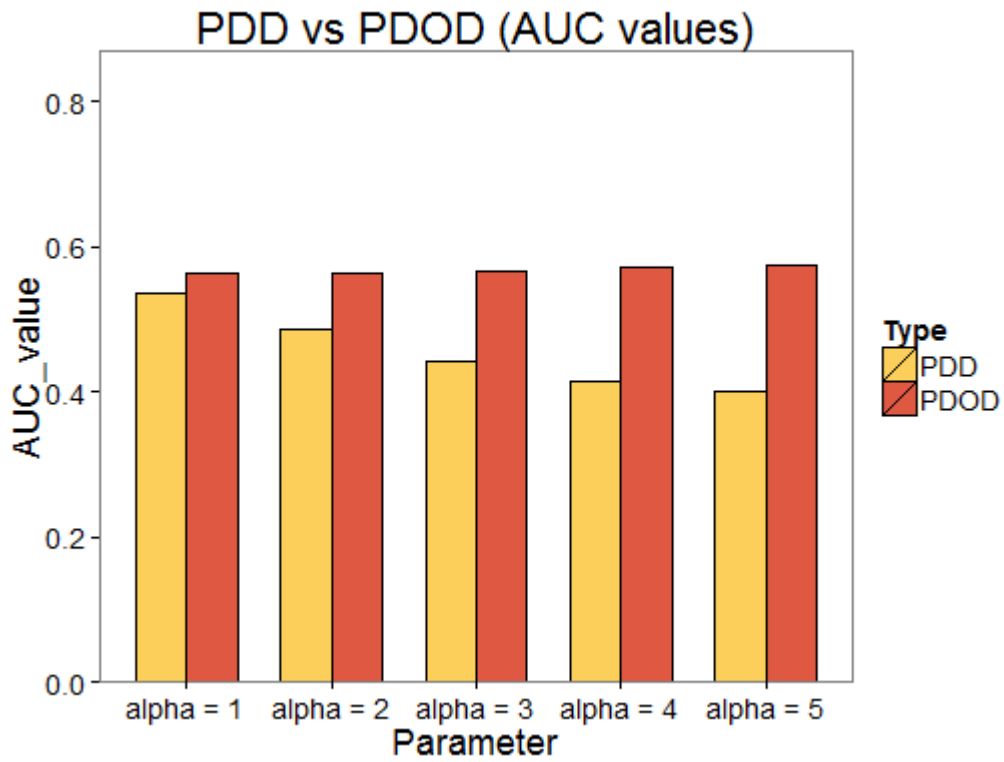

Figure S6 – Asthma

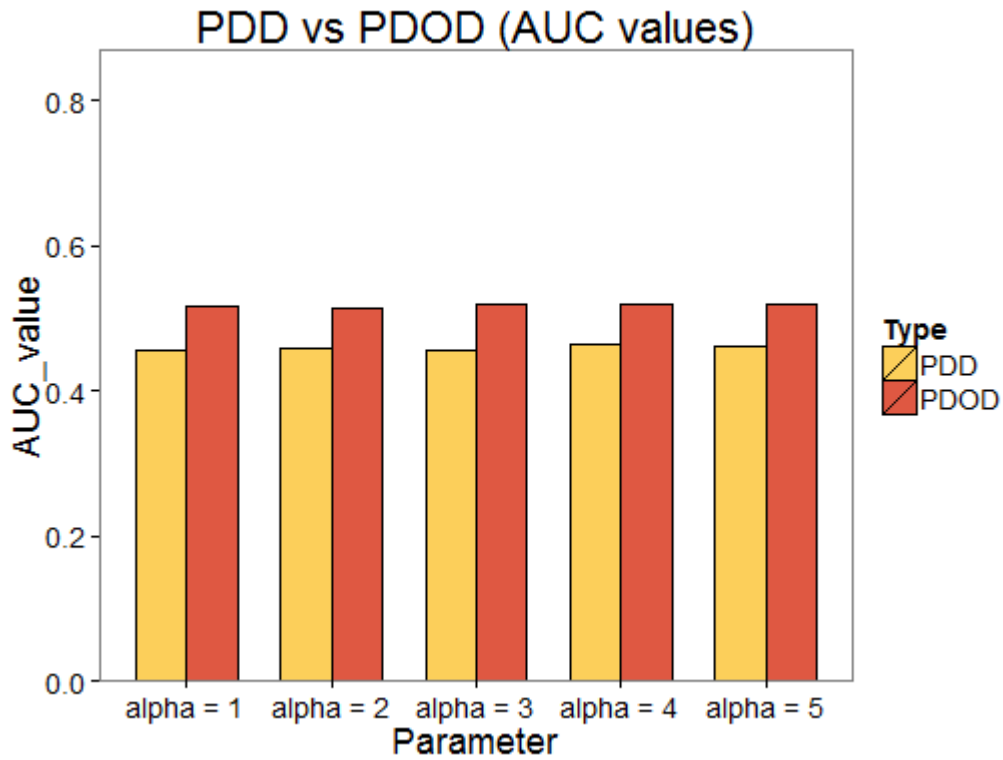

Figure S7 – Astrocytoma

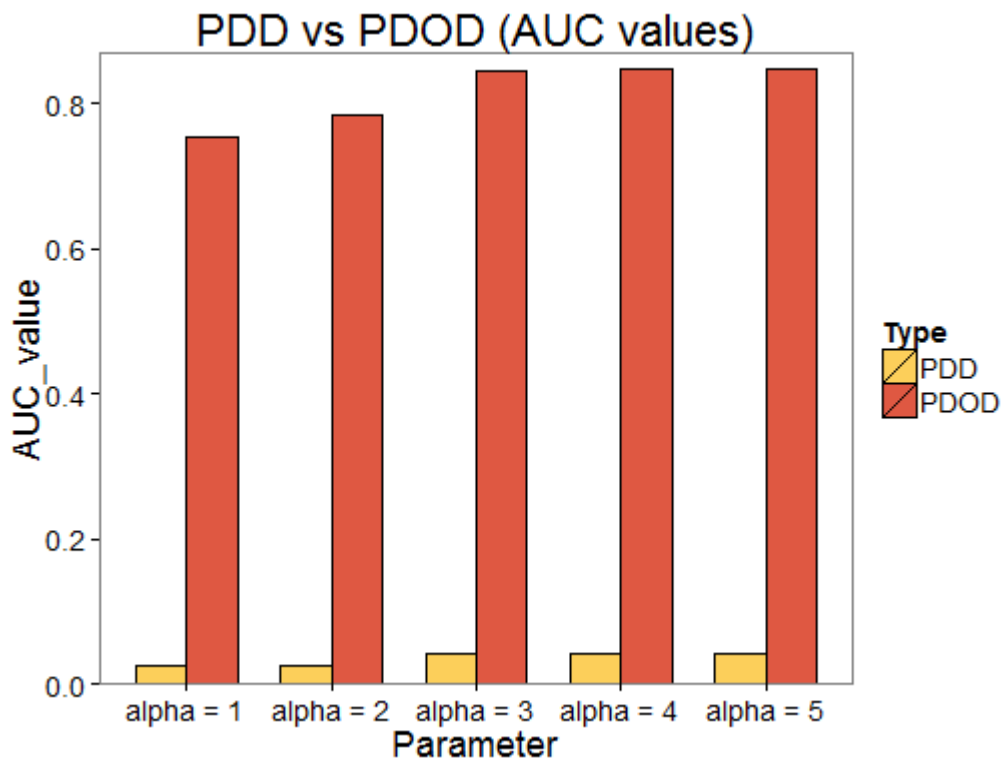

Figure S8 – Glioblastoma

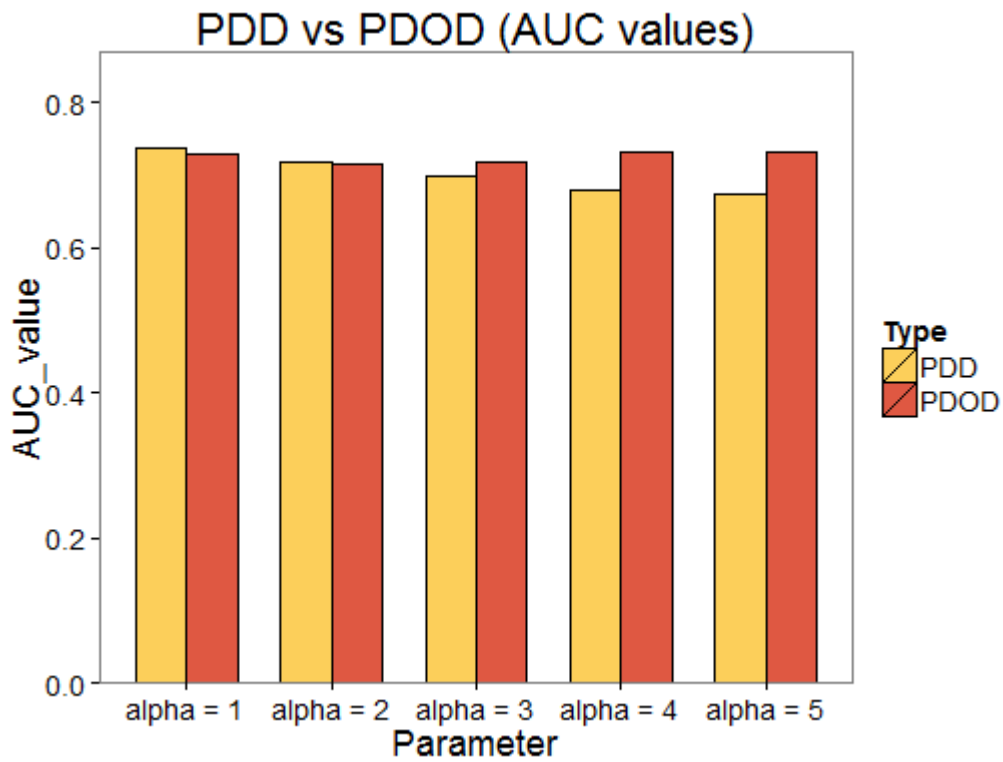

Figure S9 – Oligodendroglioma

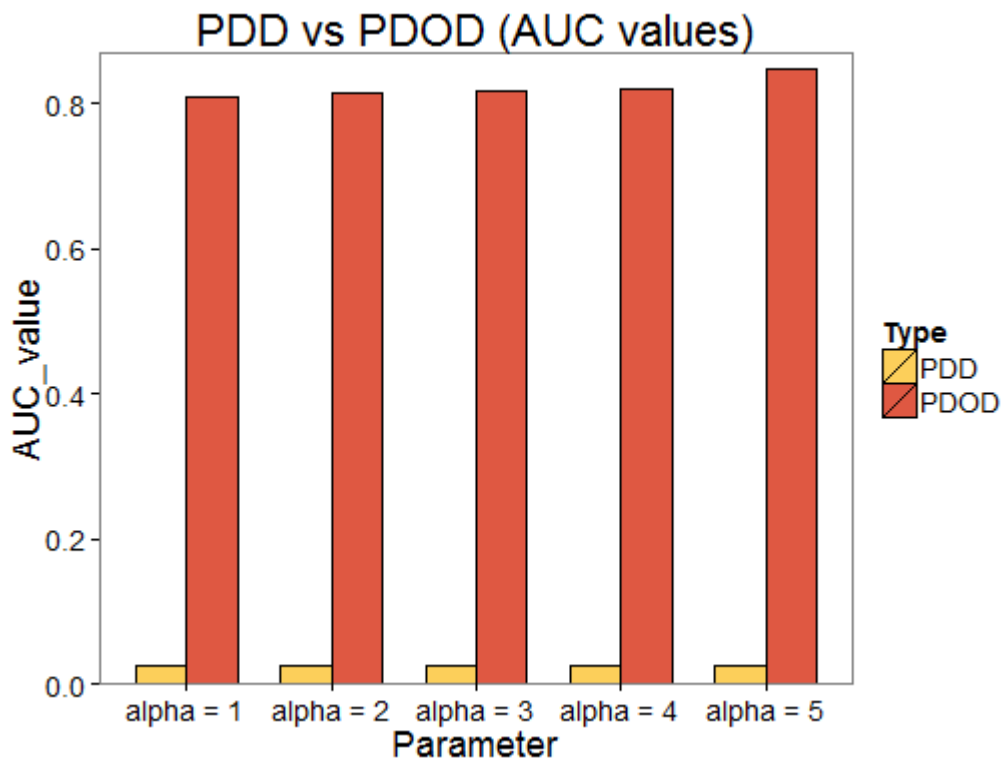

Figure S10 – Parkinson disease

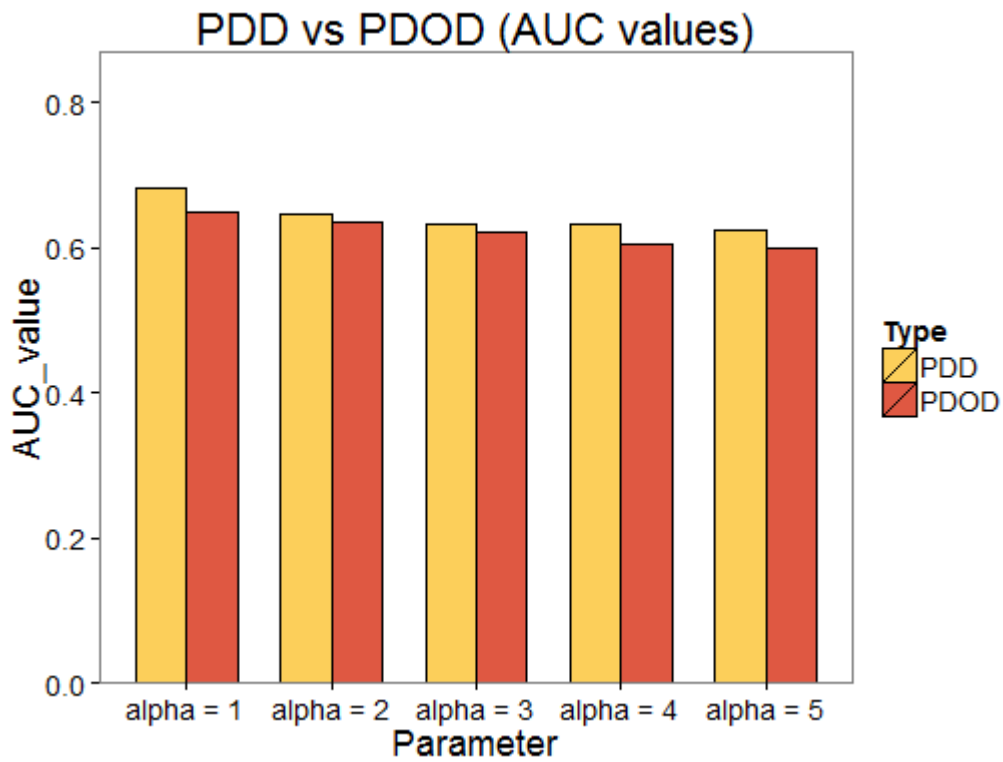

Figure S11 – Schizophrenia

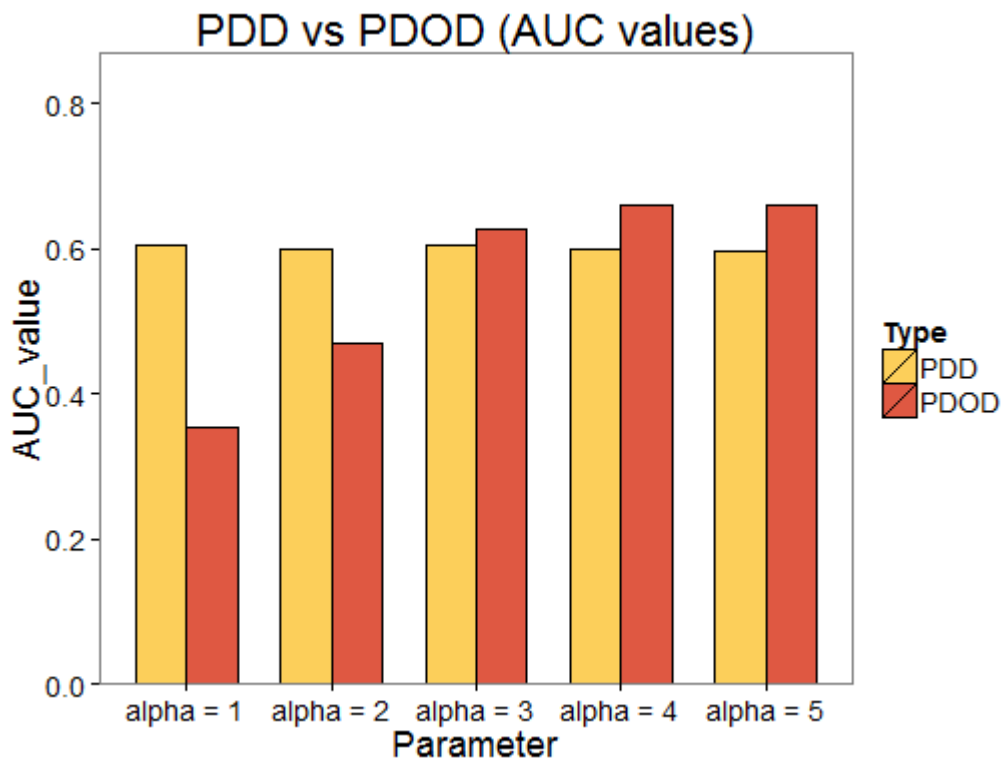

Figure S12 – Thyroid carcinoma

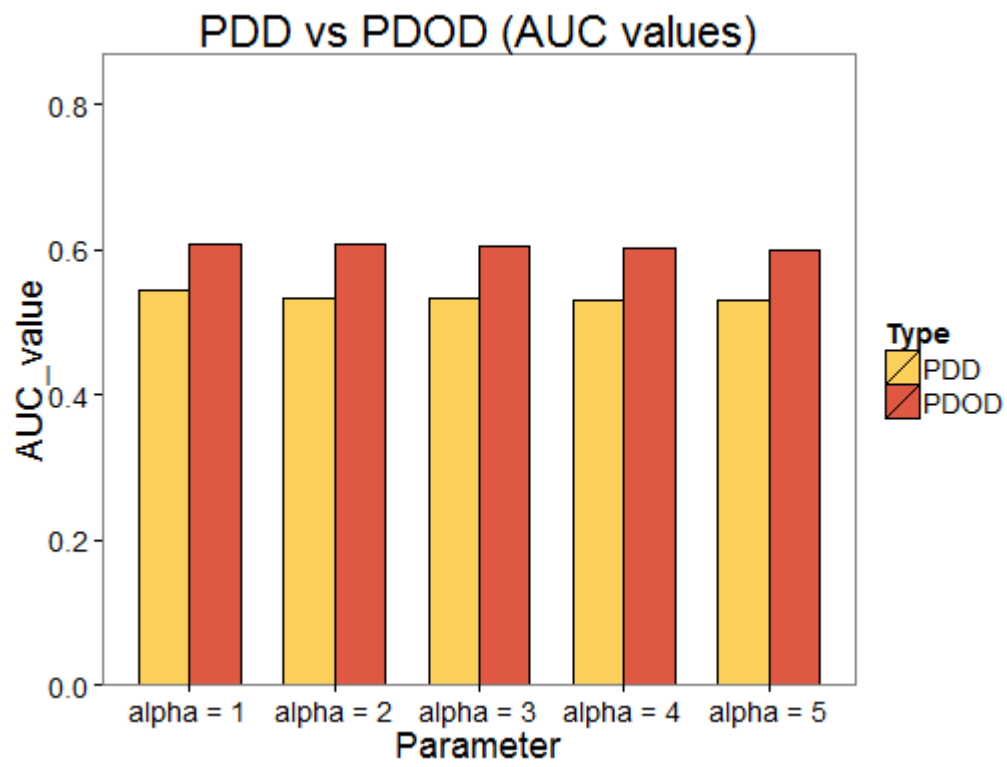

Supplement: 12918_2015_243_MOESM5_ESM.pdf [file 12918_2015_243_MOESM5_ESM.pdf]
